# Supplementary material for: A rapid and simple pipeline for synthesis of mRNA–ribosome–VHH complexes used in single-domain antibody ribosome display
Source: Royal Society of Chemistry journal article supplement (doi:10.1039/c5mb00026b), 2015-04-10

**Supplementary Fig. 1 Diagram of the pQE-30 plasmid with cloned expression cassette.**

PT5 – T5 promotor, lac O – lac operon, RBS – ribosome binding site, ATG – start codon, 6xHis – His tag sequence, *Bam*HI and *Sal*I – restriction sites, Exp. cassette – Expression cassette, Ampicillin – resistance of ampicillin, Col E1 – origin of replication.

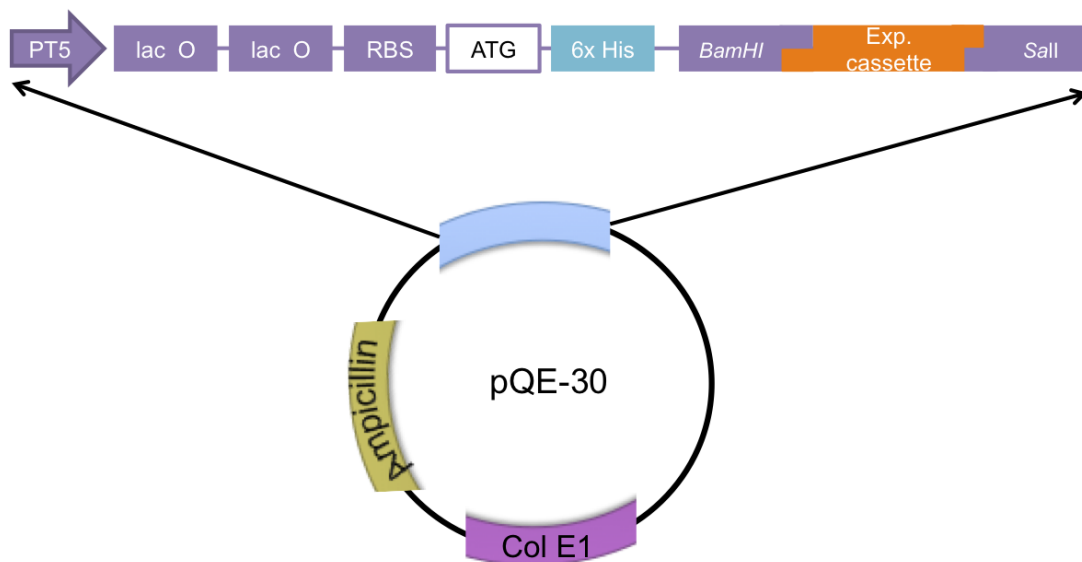

Supplement: c5mb00026b1.pdf [file c5mb00026b1.pdf]
