# Supplementary material for: A rapid and simple pipeline for synthesis of mRNA–ribosome–VHH complexes used in single-domain antibody ribosome display
Source: Royal Society of Chemistry journal article supplement (doi:10.1039/c5mb00026b), 2015-04-10
Supplement: c5mb00026b2.pdf [file c5mb00026b2.pdf]

**Supplementary table 1. Sequences used to design VHHF and VHHR primers**

| <b>Name</b>                                                              | <b>Organism</b>      | <b>Length</b> | <b>Accession number</b> |
|--------------------------------------------------------------------------|----------------------|---------------|-------------------------|
| Anti-abeta llama single-domain antibody-V31-1 (V <sub>H</sub> H) protein | <i>Vicugna pacos</i> | 393 bp        | AM922479                |
| Anti-EGFR single domain antibody gene, clone EG2                         | <i>Lama glama</i>    | 375 bp        | EU153238                |
| Anti-gliadin single domain antibody, clone 33                            | <i>Lama glama</i>    | 336 bp        | FJ155930                |
| Anti-HER2 single domain antibody C7b                                     | <i>Lama glama</i>    | 369 bp        | JX047590                |
| Anti-KRT19 single domain antibody KE9                                    | <i>Lama glama</i>    | 348 bp        | JX047591                |
| Anti-LAB phage VHH#7 immunoglobulin heavy chain variable region          | <i>Lama glama</i>    | 396 bp        | AF425251                |
| Anti-Shiga toxin antibody VHH Stx2-D2                                    | <i>Vicugna pacos</i> | 405 bp        | KF551954                |
| Anti-F4+ETEC bacteria VHH variable region, clone V3                      | <i>Lama glama</i>    | 363 bp        | KC848504                |
| Immunoglobulin heavy chain variable region                               | <i>Lama glama</i>    | 318 bp        | AJ429751                |

|                                                                    |                            |        |          |
|--------------------------------------------------------------------|----------------------------|--------|----------|
| (IGHV gene), clone C31                                             |                            |        |          |
| Immunoglobulin heavy chain variable region (IGHV gene), clone C34  | <i>Lama glama</i>          | 312 bp | AJ429752 |
| Immunoglobulin heavy chain variable region (IGHV gene), clone C9   | <i>Lama glama</i>          | 304 bp | AJ429747 |
| Immunoglobulin heavy chain variable region (IGHV gene), clone K812 | <i>Lama glama</i>          | 315 bp | AJ810810 |
| Immunoglobulin heavy chain variable region gene, clone AR32        | <i>Camelus dromedarius</i> | 270 bp | EU478171 |
| Immunoglobulin heavy chain variable region, clone 28-16 anti-LPS   | <i>Camelus dromedarius</i> | 387 bp | EU861212 |
| Immunoglobulin heavy chain variable region, clone CL9P4            | <i>Camelus dromedarius</i> | 414 bp | KC189943 |
| Immunoglobulin heavy chain VHDJ region, clone OA-cb4               | <i>Camelus bactrianus</i>  | 405 bp | KC481696 |
| Immunoglobulin heavy chain VHDJ region, clone OA-cb5               | <i>Camelus bactrianus</i>  | 405 bp | KC481697 |

|                                                                                            |                      |        |          |
|--------------------------------------------------------------------------------------------|----------------------|--------|----------|
| Immunoglobulin M heavy chain, clone VHH PS2-8                                              | <i>Lama glama</i>    | 381 bp | KF013132 |
| JP 2010534465-A/4: Monomeric VHH domain derived from anti-VP6 camelid antibodies           | <i>Lama glama</i>    | 408 bp | FW591163 |
| KR 1020120049206-A/30: GFP-specific single domain antibody                                 | artificial sequences | 360 bp | DI237845 |
| KR 1020120049206-A/35: GFP-specific single domain antibody                                 | artificial sequences | 351 bp | DI237850 |
| Single-domain immunoglobulin heavy chain variable region ( <i>ighv</i> gene), clone VI-24. | <i>Lama glama</i>    | 339 bp | AJ629048 |
