# Supplementary material for: A rapid and simple pipeline for synthesis of mRNA–ribosome–VHH complexes used in single-domain antibody ribosome display
Source: Royal Society of Chemistry journal article supplement (doi:10.1039/c5mb00026b), 2015-04-10
Supplement: c5mb00026b3.pdf [file c5mb00026b3.pdf]

**Supplementary table 2. Primers used in the study**

| Name        | Sequence                                                                                                                                      |
|-------------|-----------------------------------------------------------------------------------------------------------------------------------------------|
| VHHF        | <u>GCTGGCGCCTCTCTAGACACAGGATCCG</u> CCSAGGTGSAGST<br>SSWGSMGTC                                                                                |
| VHHR        | <u>TCTCCCTTCTATGGTACCCTT</u> TSWGGAGACRGTGACCWGGG<br>TCCC                                                                                     |
| F1F         | GGGTTATTGTCTCATGAGCGGATACATATTTGAATGTATTTA<br><u>GAAAAATAAACAAATAGGGGTTC</u>                                                                  |
| F1R         | AAACACGTAAGTGAAACCATGGAG <u>GCTGGCGCCTCTCTAG</u><br><u>ACACA</u>                                                                              |
| mCherryF    | <u>AAGGGTACCATAGAAGGGAGAAGCAAGGGCGAGGAGGAT</u><br>AAC                                                                                         |
| mCherryR    | <u>AGAGCCACCACCTGCGGCCGCCAGATCCTCCTCCGAGATCA</u><br>GCTTCTGCTC                                                                                |
| mCherryStop | GAGCAGAAGCTGATCTCGGAGGAGGATCTGTAAGTCGAC <u>G</u><br><u>CGGCCGCAGGTGGTGGCTCT</u>                                                               |
| TetF        | <u>GCGGCCGCAGGTGGTGGCTCTGGTTCCGGTGAT</u>                                                                                                      |
| TetR        | CCGCACACCAGTAAGGTGGCGGTATCAACCAGTAGCAC <u>CCAT</u><br><u>TACCATTAGCAAG</u>                                                                    |
| UA-INF      | AATAGGGGTTCGCGCACATTT                                                                                                                         |
| UA-INR      | ACTGGTGTTGTCCCAATTTTGGT                                                                                                                       |
| ArrestLoop  | CAT <u>GTCGACGGTACCCTTAAGCCGCACACCAGTAAGGTGT</u><br>GCGGTAGGGCCAGCACGGATGCCTTGCGCCTGGCTTATCCA<br>GACGGGCGTGCTGAAAT <u>CACCAGTAGCACCATTACC</u> |

\* underlined sequences represent overlapping region. Bold sequences present restriction sites for *Bam*HI and *Sal*I.
